# Supplementary material
Source: publisher figshare collection journal article supplement (https://gsajournals.figshare.com/ndownloader/files/25833995)
Supplement: Supplementary file 1 [file 25833995]

**Table S1. Source of the datasets, sex and populations used in Nath et al 2020**

| **Data Type** | **Study Source** | **Population** | **Sex** |
| --- | --- | --- | --- |
| Hi-C | Peichel et al 2017 | Paxton Lake benthic | Male |
| Optical Mapping | Peichel et al 2017 | Paxton Lake benthic | Male |
| PacBio Long reads | Peichel et al 2020 | Paxton Lake benthic | Male |
| 10X chromium | Nath et al 2020 | Lake Washington | Female |
